## Index of Authors and Titles

- BARONE, D. *See* MALACINSKI, G. M.
- BOUCAUT, J. C., DARRIBERE, T., LI, S. D., BOULEKBACHE, H., YAMADA, K. M. *and* THIERY, J. P. Evidence for the role of fibronectin in amphibian gastrulation 211
- BOULEKBACHE, H. *See* BOUCAUT, J. C.
- BRENNAN, S. *See* GURDON, J. B.
- BROWN, D. *See* WYLIE, C. C.
- CASCIO, S. *See* GURDON, J. B.
- CLEINE, J. H. *See* SLACK, J. M. W.
- COOKE, J. The system specifying body position in the early development of *Xenopus*, and its response to early perturbations 69
- DALE, L. *See* SMITH, J. C.
- DANILCHIK, M. *See* KELLER, R. E.
- DARRIBERE, T. *See* BOUCAUT, J. C.
- DAWID, I. B., HAYNES, S. R., JAMRICH, M., JONAS, E., MIYATANI, S., SARGENT, T. D. *and* WINKLES, J. A. Gene expression in *Xenopus* embryogenesis 113
- DREYER, C. *See* HAUSEN, P.
- DUPRAT, A. M., KAN, P., GUALANDRIS, L., FOULQUIER, F., MARTY, J. *and* WEBER, M. Neural induction: embryonic determination elicits full expression of specific neuronal traits 167
- FORD, C. C. Maturation promoting factor and cell cycle regulation 271
- FOULQUIER, F. *See* DUPRAT, A. M.
- GIMLICH, R. *See* KELLER, R. E.
- GIMLICH, R. L. Cytoplasmic localization and chordamesoderm induction in the frog embryo 89
- GODSAVE, S. F. *See* WYLIE, C. C.
- GORDON, R. A review of the theories of vertebrate neurulation and their relationship to the mechanics of neural tube birth defects 229
- GRUNZ, H. Information transfer during embryonic induction in amphibians 349
- GUALANDRIS, L. *See* DUPRAT, A. M.
- GURDON, J. B., MOHUN, T. J., BRENNAN, S. *and* CASCIO, S. Actin genes in *Xenopus* and their developmental control 125
- HAUSEN, P., HUI, W. Y., DREYER, C. *and* STICK, R. Distribution of nuclear proteins during maturation of the *Xenopus* oocyte 17
- HAYNES, S. R. *See* DAWID, I. B.
- HEASMAN, J. *See* WYLIE, C. C.
- HEASMAN, J., SNAPE, A., SMITH, J. *and* WYLIE, C. C. Single cell analysis of commitment in early embryogenesis 297
- JAMRICH, M. *See* DAWID, I. B.
- JONAS, E. *See* DAWID, I. B.
- JONES, E. A. Epidermal development in *Xenopus laevis*: the definition of a monoclonal antibody to an epidermal marker 155
- KAN, P. *See* DUPRAT, A. M.
- KELLER, R. E., DANILCHIK, M., GIMLICH, R. L. *and* SHIH, J. The function and mechanism of convergent extension during gastrulation of *Xenopus laevis* 185

- LASKEY, R. A. Chromosome replication in early development of *Xenopus laevis*  
 LI, S. D. *See* BOUCAUT, J. C.
- MALACINSKI, G. M. *and* BARONE, D. Towards understanding paternal extragenic contributions to early amphibian pattern specification: the axolotl *ts-1* gene as a model system 53  
 MARTY, J. *See* DUPRAT, A. M.  
 MIYATANI, S. *See* DAWID, I. B.  
 MOHUN, T. J. *See* GURDON, J. B.
- NIEUWKOOP, P. D. Inductive interactions in early amphibian development and their general nature 333
- QUARMBY, J. *See* WYLIE, C. C.
- ROBINSON, K. R. *See* TAYLOR, M. A.
- SARGENT, T. D. *See* DAWID, I. B.
- SATOH, N. Recent advances in our understanding of the temporal control of early embryonic development in amphibians 257
- SHIH, J. *See* KELLER, R. E.
- SLACK, J. M. W., CLEINE, J. H. *and* SMITH, J. C. Regional specificity of glycoconjugates in *Xenopus* and axolotl embryos 137  
 SLACK, J. M. W. *See* SMITH, J. C.  
 SMITH, J. *See* HEASMAN, J.  
 SMITH, J. C. *See* SLACK, J. M. W.  
 SMITH, J. C., DALE, L. *and* SLACK, J. M. W. Cell lineage labels and region-specific markers in the analysis of inductive interactions 317  
 SMITH, L. D. *See* TAYLOR, M. A.  
 SNAPE, A. *See* HEASMAN, J.  
 STICK, C. *See* HAUSEN, P.
- TAYLOR, M. A., ROBINSON, K. R. *and* SMITH, L. D. Intracellular pH and ribosomal protein S6 phosphorylation: role in translational control in *Xenopus* oocytes 35
- THIERY, J. P. *See* BOUCAUT, J. C.
- WANG, Y. H. *See* HAUSEN, P.
- WARNER, A. E. The role of gap junctions in amphibian development 365
- WEBER, M. *See* DUPRAT, A. M.
- WINKLES, J. A. *See* DAWID, I. B.
- WYLIE, C. C. *See* HEASMAN, J.
- WYLIE, C. C., BROWN, D., GODSAVE, S. F., QUARMBY, J. *and* HEASMAN, J. The cytoskeleton of *Xenopus* oocytes and its role in development 1
- YAMADA, K. M. *See* BOUCAUT, J. C.
